# Supplementary material for: Discovery of Bis-Imidazoline Derivatives as New CXCR4 Ligands
Source: MDPI journal article supplement (doi:10.3390/molecules28031156), 2023-01-24
Supplement: s1 [file s1]

# Figure S1

8 CH<sub>2</sub> linker

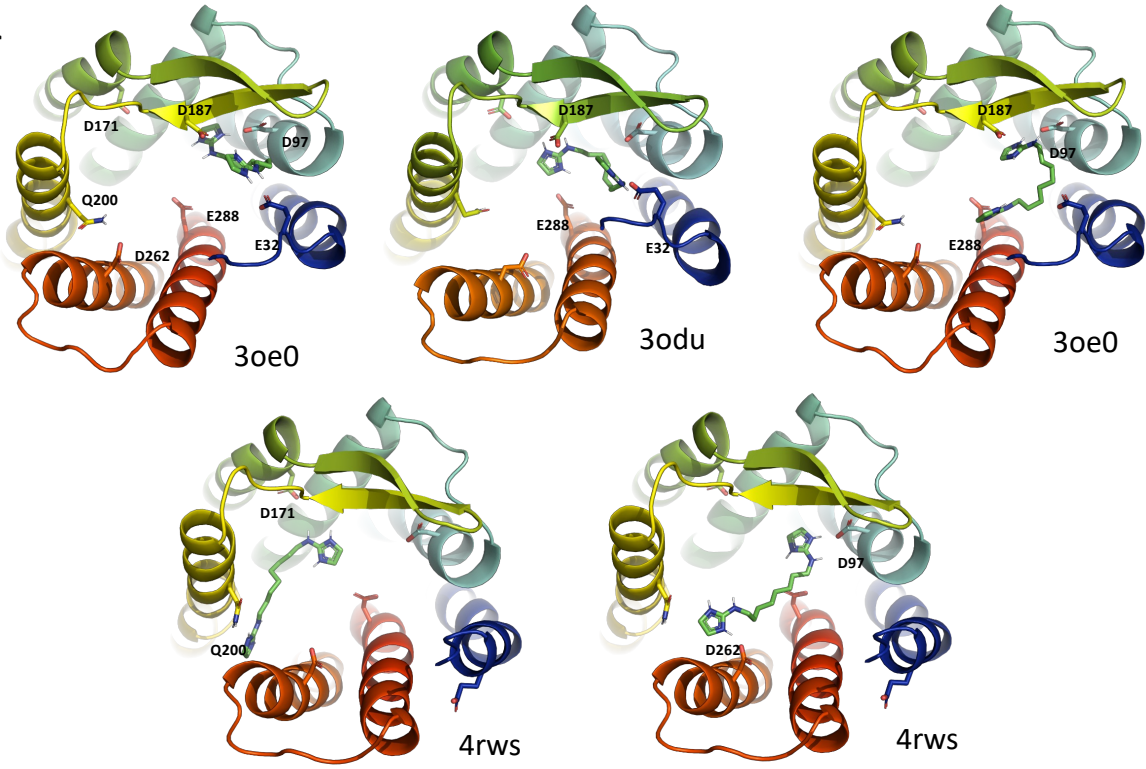

12 CH<sub>2</sub> linker

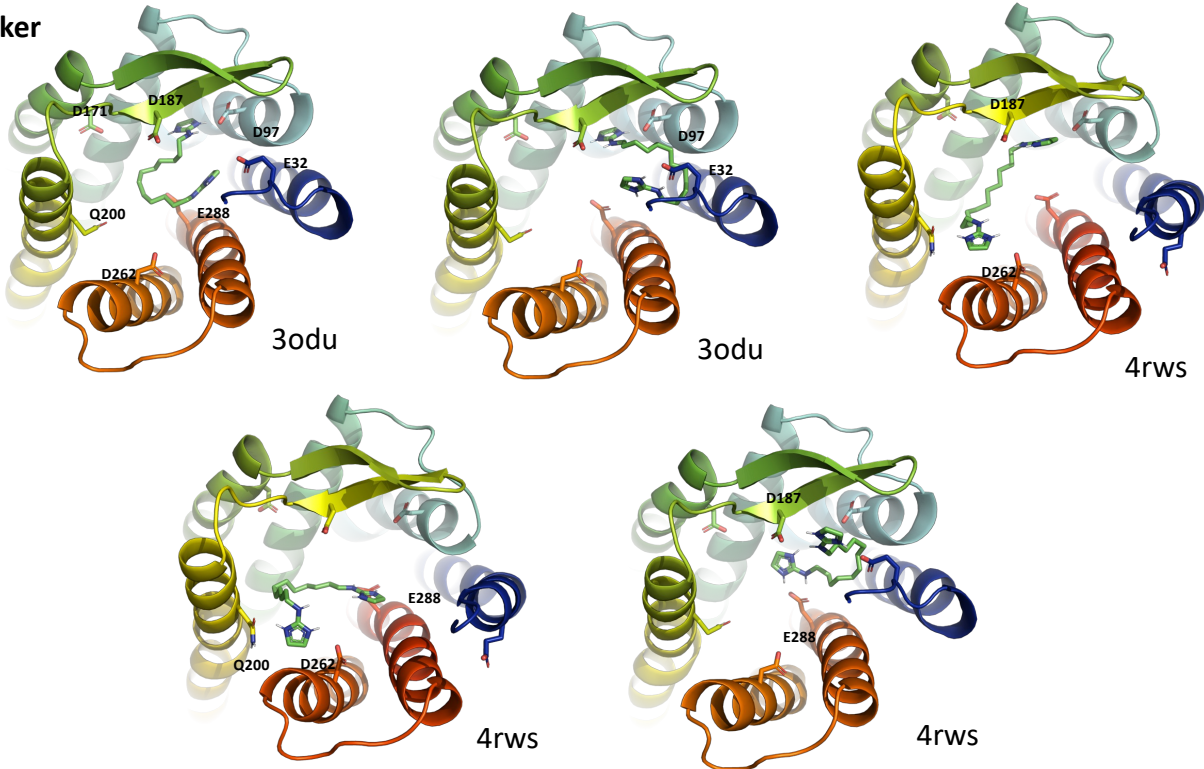

**Figure S1:** Proposed models of the binding mode of bis-imidazoline compounds mr20347 and mr20350 to CXCR4 from docking studies. The receptor is in ribbon and bis-imidazoline compounds are in stick representation in green. This figure was made with PYMOL.
